# Supplementary material for: Molecular insights and optimization strategies for the competitive binding of engineered ACE2 proteins: a multiple replica molecular dynamics study
Source: Royal Society of Chemistry journal article supplement (doi:10.1039/d3cp03392a), 2023-01-01
Supplement: d3cp03392a1.pdf [file d3cp03392a1.pdf]

## Supplementary Material

### **Molecular insights and optimization strategies for the competitive binding of engineered ACE2 proteins: a multiple replica molecular dynamics study**

Jiahao Sun,<sup>a</sup> Xinguo Liu,<sup>\*a</sup> Shaolong Zhang<sup>a</sup>, Meng Li<sup>a</sup>, Qinggang Zhang<sup>a</sup> and Jianzhong Chen<sup>\*b</sup>

---

<sup>\* a</sup>School of Physics and Electronics, Shandong Normal University, Jinan, China, 250358, E-mail:  
liuxinguo@sdu.edu.cn.

<sup>b</sup>School of Science, Shandong Jiaotong University, Jinan, China, 250357, E-mail: jzchen@sdjtu.edu.cn,  
chenjianzhong1970@163.com

**Table S1** Crystal structure and size of the system on which the initial conformation of each system is based

| <b>Complex</b> | <b>Initial conformation</b> | <b>Numbers of residues</b> | <b>Numbers of atoms</b> |
|----------------|-----------------------------|----------------------------|-------------------------|
| WT-WT          | 6m0j                        | 793                        | 12543                   |
| 3N39-WT        | 7dmu                        | 793                        | 12550                   |
| 3N94-WT        | 7dmu                        | 793                        | 12556                   |
| WT-Delta       | 6m0j                        | 793                        | 12556                   |
| 3N39-Delta     | 7dmu                        | 793                        | 12563                   |
| 3N94-Delta     | 7dmu                        | 793                        | 12569                   |
| WT-BA.1        | 7dmu                        | 793                        | 12601                   |
| 3N39-BA.1      | 7dmu                        | 793                        | 12608                   |
| 3N94-BA.1      | 7u0n                        | 793                        | 12614                   |
| WT-BA.2        | 7xb0                        | 793                        | 12577                   |
| 3N39-BA.2      | 7xb0                        | 793                        | 12584                   |
| 3N94-BA.2      | 7xb0                        | 793                        | 12590                   |
| WT-BA.4/5      | 7xo9                        | 793                        | 12577                   |
| 3N39-BA.4/5    | 7xo9                        | 793                        | 12584                   |
| 3N94-BA.4/5    | 7xo9                        | 793                        | 12590                   |

**Table S2** Solvent accessible surface area calculated using PyMOL

| <b>Components<sup>a</sup></b> | <b>ACE2</b> | <b>RBD</b> | <b>ACE2-RBD</b> | <b><math>\Delta</math>SASA</b> |
|-------------------------------|-------------|------------|-----------------|--------------------------------|
| <b>Systems</b>                |             |            |                 |                                |
| <b>WT-WT</b>                  | 26850.02    | 10755.91   | 35899.39        | 1706.54                        |
| <b>3N39-WT</b>                | 24992.08    | 10780.06   | 33492.88        | 2279.26                        |
| <b>3N94-WT</b>                | 26284.18    | 10881.08   | 35004.41        | 2160.84                        |
| <b>WT-Delta</b>               | 25678.57    | 11149.80   | 34583.13        | 2245.24                        |
| <b>3N39-Delta</b>             | 26158.58    | 10811.13   | 34994.74        | 1974.97                        |
| <b>3N94-Delta</b>             | 25643.67    | 10929.85   | 34260.11        | 2313.42                        |
| <b>WT-BA1</b>                 | 25865.58    | 10777.34   | 34494.83        | 2148.09                        |
| <b>3N39-BA1</b>               | 25967.62    | 11092.49   | 34912.73        | 2147.37                        |
| <b>3N94-BA1</b>               | 25965.97    | 11530.90   | 35509.97        | 1986.91                        |
| <b>WT-BA2</b>                 | 25652.72    | 10941.45   | 34321.64        | 2272.53                        |
| <b>3N39-BA2</b>               | 26041.53    | 11213.13   | 35457.50        | 1797.16                        |
| <b>3N94-BA2</b>               | 26283.89    | 10670.19   | 35007.18        | 1946.90                        |
| <b>WT-BA4/5</b>               | 26835.46    | 11133.72   | 36060.79        | 1908.39                        |
| <b>3N39-BA4/5</b>             | 26057.80    | 10658.51   | 34797.30        | 1919.00                        |
| <b>3N94-BA4/5</b>             | 26689.90    | 10941.27   | 35515.18        | 2115.99                        |

<sup>a</sup> All components of solvent accessible surface areas are in  $\text{\AA}^2$ .

**Table S3** Hydrogen bonding interactions of WT ACE2 with RBDs

| Complexes | Hydrogen bonds          | Distance <sup>a</sup> (Å) | Angle <sup>a</sup> (deg) | Occupancy <sup>b</sup> (%) |
|-----------|-------------------------|---------------------------|--------------------------|----------------------------|
| WT-WT     | K353-O···G502-H-N       | 2.91                      | 161.69                   | 99.64                      |
|           | D355-OD2···T500-HG1-OG1 | 2.77                      | 158.60                   | 83.19                      |
|           | N487-OD1···Y83-HH-OH    | 2.79                      | 157.94                   | 95.20                      |
| WT-Delta  | K353-O···G502-H-N       | 2.93                      | 163.30                   | 99.75                      |
|           | Y83-OH···Y489-HH-OH     | 2.83                      | 162.40                   | 98.40                      |
|           | D355-OD2···T500-HG1-OG1 | 2.70                      | 163.44                   | 94.02                      |
|           | A386-O···Y505-HH-OH     | 2.76                      | 155.56                   | 76.43                      |
|           | N487-OD1···Y83-HH-OH    | 2.75                      | 158.91                   | 88.05                      |
| WT-BA.1   | Y41-OH···G502-H-N       | 3.02                      | 153.83                   | 88.42                      |
|           | E35-OE1···R493-HE-NE    | 2.98                      | 152.46                   | 61.45                      |
|           | E35-OE2···R493-HE-NE    | 3.01                      | 149.62                   | 59.84                      |
|           | N487-OD1···Y83-HH-OH    | 2.78                      | 158.79                   | 86.92                      |
| WT-BA.2   | K353-O···G502-H-N       | 2.98                      | 162.89                   | 98.76                      |
|           | D355-OD2···T500-HG1-OG1 | 2.70                      | 162.80                   | 95.49                      |
|           | D38-OD1···Y449-HH-OH    | 2.88                      | 150.27                   | 65.90                      |
|           | D38-OD2···Y449-HH-OH    | 2.89                      | 148.87                   | 64.97                      |
|           | Q24-OE1···N487-HD21-ND2 | 2.99                      | 147.18                   | 61.98                      |
|           | N487-OD1···Y83-HH-OH    | 2.76                      | 159.29                   | 96.62                      |
|           | A475-O···S19-HG-OG      | 2.73                      | 161.33                   | 64.81                      |
| WT-BA.4/5 | K353-O···G502-H-N       | 2.94                      | 163.63                   | 99.78                      |
|           | D355-OD2···T500-HG1-OG1 | 2.77                      | 159.69                   | 75.49 <sup>c</sup>         |
|           | D38-OD1···Y449-HH-OH    | 2.88                      | 150.71                   | 72.64                      |
|           | D38-OD2···Y449-HH-OH    | 2.87                      | 150.42                   | 71.91                      |
|           | N487-OD1···Y83-HH-OH    | 2.81                      | 156.47                   | 77.71                      |

<sup>a</sup> Hydrogen bonding is determined by an acceptor···donor distance of <3.5 Å and an acceptor···H-donor angle of >120°.

<sup>b</sup> Occupancy is defined as the percentage of simulation time that a particular hydrogen bond is present.

**Table S4** Hydrogen bonding interactions of 3N39 with RBDs

| Complexes   | Hydrogen bonds          | Distance <sup>a</sup> (Å) | Angle <sup>a</sup> (deg) | Occupancy <sup>b</sup> (%) |
|-------------|-------------------------|---------------------------|--------------------------|----------------------------|
| 3N39-WT     | K353-O···G502-H-N       | 2.96                      | 162.07                   | 99.47                      |
|             | D355-OD2···T500-HG1-OG1 | 2.73                      | 162.10                   | 90.15                      |
|             | N487-OD1···Y83-HH-OH    | 2.76                      | 159.84                   | 98.09                      |
| 3N39-Delta  | K353-O···G502-H-N       | 2.93                      | 162.38                   | 99.55                      |
|             | D355-OD2···T500-HG1-OG1 | 2.72                      | 162.82                   | 91.45                      |
|             | N487-OD1···Y83-HH-OH    | 2.76                      | 159.71                   | 97.87                      |
| 3N39-BA.1   | K353-O···G502-H-N       | 2.94                      | 162.97                   | 99.53                      |
|             | D355-OD2···T500-HG1-OG1 | 2.72                      | 162.41                   | 93.95                      |
|             | Q24-OE1···N487-HD21-ND2 | 2.97                      | 148.09                   | 61.19                      |
|             | D38-OD1···Y449-HH-OH    | 2.88                      | 151.67                   | 57.17                      |
|             | D38-OD2···Y449-HH-OH    | 2.88                      | 148.74                   | 56.02                      |
|             | N487-OD1···Y83-HH-OH    | 2.77                      | 160.14                   | 95.70                      |
| 3N39-BA.2   | K353-O···G502-H-N       | 2.94                      | 162.64                   | 99.52                      |
|             | D355-OD2···T500-HG1-OG1 | 2.74                      | 161.62                   | 94.78                      |
|             | D38-OD2···R493-HH21-NH2 | 2.90                      | 153.36                   | 78.30                      |
|             | D38-OD1···R493-HH21-NH2 | 3.07                      | 145.35                   | 66.34                      |
|             | D38-OD1···R493-HE-NE    | 2.97                      | 159.25                   | 61.45                      |
|             | Q24-OE1···N487-HD21-ND2 | 2.98                      | 146.28                   | 60.89                      |
|             | N487-OD1···Y83-HH-OH    | 2.77                      | 158.53                   | 97.44                      |
| 3N39-BA.4/5 | K353-O···G502-H-N       | 2.96                      | 163.39                   | 99.65                      |
|             | D355-OD2···T500-HG1-OG1 | 2.76                      | 160.00                   | 81.16                      |
|             | H34-ND1···Q493-HE22-NE2 | 3.01                      | 160.59                   | 76.45                      |
|             | N487-OD1···Y83-HH-OH    | 2.79                      | 158.39                   | 93.06                      |

<sup>a</sup> Hydrogen bonding is determined by an acceptor···donor distance of <3.5 Å and an acceptor···H-donor angle of >120°.

<sup>b</sup> Occupancy is defined as the percentage of simulation time that a particular hydrogen bond is present.

**Table S5** Hydrogen bonding interactions of 3N94 with RBDs

| Complexes   | Hydrogen bonds          | Distance <sup>a</sup> (Å) | Angle <sup>a</sup> (deg) | Occupancy <sup>b</sup> (%) |
|-------------|-------------------------|---------------------------|--------------------------|----------------------------|
| 3N94-WT     | K353-O···G502-H-N       | 2.90                      | 162.65                   | 99.93                      |
|             | D355-OD2···T500-HG1-OG1 | 2.77                      | 159.70                   | 80.99                      |
|             | Q24-OE1···N487-HD21-ND2 | 2.97                      | 145.93                   | 61.24                      |
|             | N487-OD1···Y83-HH-OH    | 2.76                      | 160.83                   | 98.74                      |
| 3N94-Delta  | K353-O···G502-H-N       | 2.91                      | 162.70                   | 99.85                      |
|             | D355-OD2···T500-HG1-OG1 | 2.72                      | 160.73                   | 85.37                      |
|             | Y83-OH···Y489-HH-OH     | 2.90                      | 157.17                   | 77.00                      |
|             | Q24-OE1···N487-HD21-ND2 | 2.94                      | 155.40                   | 59.45                      |
|             | N487-OD1···Y83-HH-OH    | 2.78                      | 157.30                   | 77.06                      |
| 3N94-BA.1   | K353-O···G502-H-N       | 2.98                      | 163.37                   | 98.83                      |
|             | D355-OD2···T500-HG1-OG1 | 2.75                      | 160.26                   | 83.43                      |
|             | D38-OD2···R493-HH22-NH2 | 2.94                      | 149.27                   | 79.59                      |
|             | D38-OD1···R493-HH22-NH2 | 3.00                      | 146.79                   | 79.34                      |
|             | N487-OD1···Y83-HH-OH    | 2.76                      | 159.79                   | 96.38                      |
| 3N94-BA.2   | K353-O···G502-H-N       | 2.94                      | 163.40                   | 99.73                      |
|             | D355-OD2···T500-HG1-OG1 | 2.74                      | 160.06                   | 84.70                      |
|             | D38-OD2···Y449-HH-OH    | 2.86                      | 149.61                   | 71.47                      |
|             | D38-OD1···Y449-HH-OH    | 2.87                      | 149.33                   | 70.69                      |
|             | N487-OD1···Y83-HH-OH    | 2.77                      | 159.35                   | 97.35                      |
| 3N94-BA.4/5 | K353-O···G502-H-N       | 2.97                      | 163.84                   | 99.07                      |
|             | D355-OD2···T500-HG1-OG1 | 2.76                      | 160.12                   | 74.99                      |
|             | N487-OD1···Y83-HH-OH    | 2.79                      | 158.25                   | 93.14                      |
|             | A475-O···S19-HG-OG      | 2.76                      | 161.10                   | 58.25                      |

<sup>a</sup> Hydrogen bonding is determined by an acceptor···donor distance of <3.5 Å and an acceptor···H-donor angle of >120°.

<sup>b</sup> Occupancy is defined as the percentage of simulation time that a particular hydrogen bond is present.

**Table S6** Energetic contributions of separate residues to bindings of ACE2s to WT RBD

| Energy (kcal/mol) | $T_{vdW}$   |       |          | $T_{ele}$ |         |          | $T_{gbsolv}$ |         |         | $T_{gbsolv}$ |       |          |          |
|-------------------|-------------|-------|----------|-----------|---------|----------|--------------|---------|---------|--------------|-------|----------|----------|
|                   | WT          | 3N39  | 3N94     | WT        | 3N39    | 3N94     | WT           | 3N39    | 3N94    | WT           | 3N39  | 3N94     |          |
| <b>ACE2</b>       | <b>S19</b>  | -0.77 | -0.73    | -0.40     | 14.83   | 14.91    | 14.19        | -11.86  | -11.93  | -12.70       | 2.19  | 2.25     | 1.09     |
|                   | <b>Q24</b>  | -2.83 | -2.71    | -2.69     | -3.11   | -3.29    | -2.87        | 3.77    | 3.92    | 3.76         | -2.18 | -2.09    | -1.79    |
|                   | <b>T27</b>  | -3.07 | -3.03    | -4.55(Y)  | -1.49   | -1.58    | -1.56(Y)     | 2.52    | 2.42    | 3.04(Y)      | -2.04 | -2.19    | -3.07(Y) |
|                   | <b>H34</b>  | -3.09 | -3.14    | -3.08(I)  | -2.40   | -0.64    | -0.38(I)     | 4.49    | 2.94    | 0.41(I)      | -1.01 | -0.84    | -3.05(I) |
|                   | <b>Y41</b>  | -2.18 | -2.98    | -2.82     | 0.84    | 0.93     | 0.01         | 0.15    | 0.28    | 0.73         | -1.18 | -1.77    | -2.09    |
|                   | <b>L79</b>  | -1.17 | -2.43(F) | -2.20(F)  | -0.36   | -0.72(F) | -0.41(F)     | 0.53    | 1.19(F) | 0.93(F)      | -1.00 | -1.96(F) | -1.68(F) |
|                   | <b>Y83</b>  | -1.40 | -1.65    | -1.59     | -3.64   | -4.25    | -3.58        | 2.59    | 2.92    | 2.56         | -2.45 | -2.98    | -2.61    |
|                   | <b>K353</b> | -4.84 | -5.35    | -4.65     | 10.23   | 2.89     | 8.10         | -8.09   | -1.57   | -6.98        | -2.70 | -4.04    | -3.53    |
|                   | <b>D355</b> | -1.76 | -1.80    | -1.75     | -26.89  | -30.17   | -29.90       | 24.29   | 26.87   | 27.29        | -4.35 | -5.11    | -4.36    |
| <b>RBD</b>        | <b>D405</b> | -0.27 | -0.23    | -0.16     | 131.93  | 138.85   | 161.47       | -129.12 | -135.93 | -158.49      | 2.54  | 2.69     | 2.82     |
|                   | <b>E406</b> | -0.13 | -0.14    | -0.10     | 123.81  | 135.44   | 157.45       | -121.51 | -132.98 | -154.89      | 2.17  | 2.32     | 2.46     |
|                   | <b>K417</b> | -0.23 | -0.32    | 0.22      | -143.23 | -174.14  | -200.32      | 140.85  | 170.87  | 195.19       | -2.60 | -3.59    | -4.91    |
|                   | <b>Y449</b> | -0.02 | -0.45    | -1.02     | -1.43   | -7.37    | -2.67        | 1.50    | 4.88    | 2.19         | 0.05  | -2.93    | -1.50    |
|                   | <b>L455</b> | -2.30 | -2.39    | -2.09     | 1.60    | 3.25     | 3.80         | -1.50   | -3.11   | -3.75        | -2.19 | -2.25    | -2.04    |
|                   | <b>F456</b> | -2.57 | -2.68    | -2.76     | -1.09   | -2.41    | -2.60        | 1.64    | 2.91    | 3.10         | -2.02 | -2.17    | -2.26    |
|                   | <b>E484</b> | -0.23 | -0.44    | -0.31     | 103.59  | 111.02   | 124.99       | -101.37 | -108.33 | -122.32      | 2.00  | 2.26     | 2.36     |
|                   | <b>F486</b> | -3.93 | -5.03    | -4.92     | -3.36   | -3.51    | -3.78        | 4.29    | 4.51    | 4.77         | -3.00 | -4.02    | -3.94    |
|                   | <b>Y489</b> | -0.45 | -4.39    | -3.82     | 0.62    | -1.79    | -0.64        | -0.23   | 3.42    | 2.74         | -0.06 | -2.76    | -1.73    |
|                   | <b>Q493</b> | -1.95 | -2.28    | -1.65     | -14.39  | -9.42    | -10.64       | 12.94   | 10.03   | 10.07        | -3.40 | -1.68    | -2.21    |
|                   | <b>Y495</b> | -0.42 | -0.52    | -0.51     | -2.34   | -4.17    | -4.15        | 2.79    | 2.76    | 4.44         | 0.02  | -1.92    | -0.22    |
|                   | <b>G496</b> | -0.78 | -0.58    | -0.31     | -4.59   | -0.89    | -5.11        | 2.86    | 0.44    | 3.53         | -2.51 | -1.02    | -1.90    |
|                   | <b>Q498</b> | -2.02 | -2.47    | -2.21     | -5.92   | -7.08    | -6.66        | 4.88    | 4.79    | 3.47         | -3.06 | -4.76    | -5.41    |
|                   | <b>T500</b> | -3.07 | -3.03    | -3.60     | -3.30   | -4.09    | -3.63        | 3.77    | 4.32    | 3.99         | -2.60 | -2.81    | -3.25    |
|                   | <b>N501</b> | -3.48 | -4.06    | -3.95     | -2.81   | -11.12   | -12.89       | 4.33    | 11.75   | 12.99        | -1.96 | -3.43    | -3.84    |
| <b>Y505</b>       | -3.92       | -4.50 | -4.51    | -6.06     | -6.80   | -3.83    | 5.57         | 6.39    | 4.72    | -4.40        | -4.92 | -3.62    |          |

**Table S7** Energetic contributions of separate residues to bindings of ACE2s to Delta

| Energy (kcal/mol) | $T_{vdW}$ |       |          | $T_{ele}$ |         |          | $T_{gbsolv}$ |         |         | $T_{gbsolv}$ |       |          | $T_{gbsolv}$ |      |      |
|-------------------|-----------|-------|----------|-----------|---------|----------|--------------|---------|---------|--------------|-------|----------|--------------|------|------|
|                   | WT        | 3N39  | 3N94     | WT        | 3N39    | 3N94     | WT           | 3N39    | 3N94    | WT           | 3N39  | 3N94     | WT           | 3N39 | 3N94 |
| <b>ACE2</b>       | S19       | -0.61 | -0.56    | -1.02     | 32.42   | 29.19    | 37.20        | -29.57  | -26.56  | -33.09       | 2.23  | 2.07     | 3.08         |      |      |
|                   | Q24       | -2.99 | -2.63    | -2.70     | -2.75   | -3.61    | -4.37        | 3.85    | 4.19    | 5.13         | -1.90 | -2.04    | -1.95        |      |      |
|                   | T27       | -2.74 | -2.81    | -7.11(Y)  | -1.06   | -1.43    | -3.27(Y)     | 1.90    | 2.27    | 4.88(Y)      | -1.91 | -1.97    | -5.50(Y)     |      |      |
|                   | K31       | -4.25 | -3.05(N) | -3.37(N)  | 17.77   | 0.22(N)  | -1.24(N)     | -15.66  | 1.21(N) | 3.26(N)      | -2.14 | -1.62(N) | -1.35(N)     |      |      |
|                   | H34       | -3.15 | -3.07    | -3.46(I)  | -0.44   | -1.14    | 0.68(I)      | 2.94    | 3.47    | -0.58(I)     | -0.66 | -0.73    | -3.36(I)     |      |      |
|                   | Y41       | -3.46 | -3.01    | -1.90     | 0.76    | 1.31     | 1.63         | 0.25    | -0.13   | -0.56        | -2.45 | -1.84    | -0.83        |      |      |
|                   | L79       | -1.73 | -2.42(F) | -3.06(F)  | -0.38   | -0.69(F) | -0.76(F)     | 0.54    | 1.18(F) | 1.35(F)      | -1.57 | -1.93(F) | -2.46(F)     |      |      |
|                   | Y83       | -1.16 | -1.64    | -1.63     | -5.66   | -3.80    | -4.61        | 3.14    | 2.52    | 2.70         | -3.68 | -2.93    | -3.54        |      |      |
|                   | K353      | -5.52 | -4.56    | -5.33     | 36.22   | 25.07    | 33.80        | -32.63  | -23.53  | -30.03       | -1.92 | -3.02    | -1.56        |      |      |
|                   | D355      | -1.71 | -1.74    | -1.49     | -43.41  | -42.97   | -37.70       | 39.65   | 39.34   | 34.80        | -5.46 | -5.36    | -4.40        |      |      |
|                   | R403      | -0.89 | -0.77    | -0.58     | -145.13 | -152.17  | -179.18      | 144.37  | 149.97  | 178.06       | -1.66 | -2.96    | -1.70        |      |      |
|                   | D405      | -0.44 | -0.22    | -0.21     | 130.87  | 139.41   | 164.02       | -127.73 | -136.71 | -160.79      | 2.71  | 2.48     | 3.02         |      |      |
|                   | E406      | -0.16 | -0.12    | -0.10     | 126.38  | 134.18   | 159.85       | -123.94 | -131.93 | -157.24      | 2.28  | 2.13     | 2.51         |      |      |
|                   | K417      | -0.49 | -0.23    | -0.19     | -144.49 | -174.05  | -206.49      | 142.49  | 170.68  | 203.04       | -2.49 | -3.60    | -3.64        |      |      |
|                   | Y449      | -0.78 | -0.42    | -0.34     | -1.18   | -7.95    | -2.54        | 1.49    | 5.10    | 2.03         | -0.46 | -3.27    | -0.85        |      |      |
|                   | L455      | -2.86 | -2.25    | -2.84     | 1.94    | 3.06     | 2.31         | -1.75   | -2.93   | -2.05        | -2.68 | -2.12    | -2.57        |      |      |
|                   | F456      | -2.69 | -2.61    | -2.29     | -0.90   | -2.37    | -1.31        | 1.37    | 2.88    | 1.69         | -2.22 | -2.11    | -1.91        |      |      |
|                   | A475      | -1.17 | -1.42    | -2.60     | -3.79   | -3.99    | -6.10        | 3.60    | 3.89    | 6.11         | -1.36 | -1.52    | -2.59        |      |      |
| <b>RBD</b>        | E484      | -0.27 | -0.37    | -0.22     | 106.95  | 112.64   | 121.90       | -104.63 | -109.96 | -119.62      | 2.06  | 2.31     | 2.06         |      |      |
|                   | F486      | -4.50 | -5.00    | -4.99     | -3.33   | -3.53    | -4.01        | 4.28    | 4.56    | 4.70         | -3.56 | -3.96    | -4.30        |      |      |
|                   | N487      | -1.83 | -1.73    | -2.29     | -3.81   | -4.23    | -4.89        | 3.99    | 4.32    | 5.09         | -1.65 | -1.65    | -2.10        |      |      |
|                   | Y489      | -4.80 | -4.38    | -5.56     | -2.86   | -1.92    | -5.75        | 3.72    | 3.52    | 6.51         | -3.94 | -2.78    | -4.80        |      |      |
|                   | Q493      | -2.40 | -2.19    | -4.80     | -18.04  | -8.71    | -6.31        | 15.84   | 9.49    | 7.01         | -4.60 | -1.41    | -1.50        |      |      |
|                   | Y495      | -0.67 | -0.52    | -0.64     | -2.63   | -4.17    | -3.52        | 2.88    | 2.76    | 4.04         | -0.41 | -1.92    | -0.13        |      |      |
|                   | G496      | -0.94 | -0.26    | -0.95     | -2.40   | -4.20    | -2.95        | 3.13    | 2.74    | 1.97         | -0.22 | -1.72    | -1.94        |      |      |
|                   | Q498      | -3.06 | -2.39    | -2.33     | -7.10   | -6.70    | -2.54        | 4.92    | 4.93    | 3.09         | -5.24 | -4.16    | -1.78        |      |      |
|                   | T500      | -2.83 | -3.00    | -3.40     | -4.73   | -4.63    | -3.08        | 4.82    | 4.57    | 2.84         | -2.75 | -3.05    | -3.64        |      |      |
|                   | N501      | -4.19 | -4.04    | -3.13     | -10.55  | -10.74   | -1.84        | 11.14   | 11.54   | 2.99         | -3.60 | -3.24    | -1.98        |      |      |
|                   | Y505      | -5.35 | -4.39    | -4.24     | -6.09   | -7.39    | -6.94        | 6.25    | 6.71    | 6.14         | -5.19 | -5.08    | -5.04        |      |      |



**Table S8** Energetic contributions of separate residues to bindings of ACE2s to BA.1

| Energy (kcal/mol) | $T_{vdW}$ |       |          | $T_{ele}$ |         |          | $T_{gbsolv}$ |         |           | $T_{gbtot}$ |        |          |          |
|-------------------|-----------|-------|----------|-----------|---------|----------|--------------|---------|-----------|-------------|--------|----------|----------|
|                   | WT        | 3N39  | 3N94     | WT        | 3N39    | 3N94     | WT           | 3N39    | 3N94      | WT          | 3N39   | 3N94     |          |
| <b>ACE2</b>       | S19       | -0.88 | -0.90    | -0.41     | 33.88   | 34.14    | 32.75        | -30.71  | -30.74    | -30.85      | 2.29   | 2.50     | 1.49     |
|                   | Q24       | -3.08 | -2.90    | -2.80     | -3.29   | -4.02    | -3.38        | 4.28    | 4.97      | 4.47        | -2.08  | -1.95    | -1.71    |
|                   | T27       | -3.12 | -2.74    | -4.43(Y)  | -1.45   | -1.16    | -1.18(Y)     | 2.56    | 2.08      | 2.87(Y)     | -2.00  | -1.83    | -2.75(Y) |
|                   | K31       | -3.35 | -2.79(N) | -2.71(N)  | 58.05   | -7.43(N) | -4.33(N)     | -54.78  | 8.51(N)   | 6.06(N)     | -0.09  | -1.71(N) | -0.98(N) |
|                   | H34       | -4.22 | -3.02    | -3.06(I)  | -9.54   | -6.16    | -3.04(I)     | 12.07   | 8.13      | 3.37(I)     | -1.68  | -1.06    | -2.74(I) |
|                   | E35       | -0.97 | -1.43(K) | -1.38(K)  | -93.28  | 64.17(K) | 62.45(K)     | 92.35   | -61.77(K) | -59.58(K)   | -1.91  | 0.97(K)  | 1.49(K)  |
|                   | D38       | -0.69 | -0.43    | 0.27      | -106.80 | -99.33   | -101.59      | 105.24  | 96.12     | 98.27       | -2.25  | -3.65    | -3.05    |
|                   | Y41       | -3.84 | -3.10    | -2.59     | -0.04   | 1.63     | 1.08         | 1.11    | -0.29     | 0.20        | -2.76  | -1.76    | -1.30    |
|                   | L79       | -0.89 | -2.02(F) | -2.09(F)  | 0.37    | 0.19(F)  | 0.23(F)      | -0.22   | 0.29(F)   | 0.23(F)     | -0.75  | -1.55(F) | -1.63(F) |
|                   | Y83       | -1.23 | -1.68    | -1.62     | -2.81   | -2.88    | -3.06        | 1.95    | 2.07      | 2.15        | -2.09  | -2.50    | -2.54    |
|                   | K353      | -4.62 | -5.57    | -5.37     | 49.35   | 67.16    | 81.78        | -45.45  | -63.22    | -77.37      | -0.72  | -1.63    | -0.96    |
|                   | D355      | -0.85 | -1.81    | -1.97     | -51.58  | -65.82   | -67.46       | 51.76   | 62.68     | 64.63       | -0.67  | -4.95    | -4.80    |
|                   | R403      | -1.75 | -0.60    | -0.52     | -153.37 | -137.89  | -172.67      | 152.00  | 137.33    | 171.23      | -3.12  | -1.17    | -1.97    |
|                   | D405      | -1.31 | -0.18    | -0.18     | 126.95  | 133.30   | 161.26       | -123.25 | -130.73   | -158.24     | 2.39   | 2.39     | 2.84     |
|                   | E406      | -0.32 | -0.11    | -0.10     | 124.79  | 128.90   | 156.80       | -122.57 | -126.69   | -154.24     | 1.90   | 2.10     | 2.46     |
|                   | K417N     | -0.73 | -0.28    | -0.18     | -1.92   | -3.78    | -5.09        | 2.69    | 4.15      | 5.36        | 0.04   | 0.10     | 0.09     |
|                   | N440K     | -0.02 | -0.09    | -0.29     | -113.14 | -131.12  | -154.76      | 111.86  | 129.86    | 153.15      | -1.31  | -1.36    | -1.89    |
|                   | Y449      | -0.24 | -0.36    | -0.27     | -0.22   | -5.49    | -0.41        | 0.54    | 3.59      | 0.70        | 0.08   | -2.26    | 0.02     |
|                   | L455      | -2.52 | -1.96    | -1.44     | 0.99    | 1.74     | 1.67         | -0.77   | -1.56     | -1.54       | -2.30  | -1.78    | -1.32    |
|                   | F456      | -2.67 | -2.38    | -2.50     | -0.95   | -2.51    | -2.49        | 1.55    | 3.08      | 3.08        | -2.07  | -1.81    | -1.91    |
|                   | A475      | -1.86 | -1.52    | -1.76     | -5.62   | -4.67    | -3.32        | 5.40    | 4.49      | 3.45        | -2.08  | -1.70    | -1.63    |
|                   | E484A     | -0.07 | -0.13    | -0.15     | -0.38   | -0.92    | -1.01        | 0.50    | 1.08      | 1.18        | 0.05   | 0.03     | 0.02     |
| <b>RBD</b>        | F486      | -3.26 | -4.63    | -4.76     | -2.98   | -3.36    | -3.65        | 3.88    | 4.29      | 4.60        | -2.35  | -3.70    | -3.81    |
|                   | N487      | -1.98 | -1.79    | -1.81     | -3.58   | -3.45    | -2.91        | 4.34    | 3.54      | 3.15        | -1.23  | -1.70    | -1.57    |
|                   | Y489      | -3.60 | -3.76    | -3.91     | -0.23   | -1.32    | -1.14        | 2.17    | 3.35      | 3.27        | -1.66  | -1.73    | -1.78    |
|                   | Q493R     | -1.85 | -2.55    | -2.02     | -191.21 | -142.83  | -183.20      | 180.33  | 141.69    | 177.65      | -12.73 | -3.68    | -7.57    |
|                   | Y495      | -0.34 | -0.33    | -0.23     | -4.55   | -1.72    | -2.61        | 4.66    | 2.13      | 3.02        | -0.23  | 0.08     | 0.18     |
|                   | G496S     | -0.42 | -0.95    | -0.66     | -5.33   | -2.85    | -0.08        | 4.42    | 2.21      | 0.31        | -1.33  | -1.59    | -0.43    |
|                   | Q498R     | -1.17 | -2.67    | -2.31     | -133.76 | -156.42  | -161.40      | 133.64  | 153.11    | 161.26      | -1.29  | -5.97    | -2.46    |
|                   | T500      | -1.19 | -3.05    | -3.76     | 0.96    | -4.20    | -3.96        | 0.38    | 4.07      | 3.55        | 0.14   | -3.18    | -4.16    |
|                   | N501Y     | -3.23 | -5.41    | -5.17     | -4.42   | -2.68    | -3.36        | 4.72    | 3.13      | 3.91        | -2.93  | -4.96    | -4.62    |
|                   | Y505H     | -4.57 | -3.40    | -3.27     | -7.97   | -7.37    | -7.75        | 9.67    | 8.28      | 8.71        | -2.88  | -2.49    | -2.31    |

**Table S9** Energetic contributions of separate residues to bindings of ACE2s to BA.2

| Energy (kcal/mol) | $T_{vdW}$ |       |          | $T_{ele}$ |         |          | $T_{gbsolv}$ |         |           | $T_{gbsolv} + T_{gbsolv} + T_{gbsolv}$ |       |          |          |
|-------------------|-----------|-------|----------|-----------|---------|----------|--------------|---------|-----------|----------------------------------------|-------|----------|----------|
|                   | WT        | 3N39  | 3N94     | WT        | 3N39    | 3N94     | WT           | 3N39    | 3N94      | WT                                     | 3N39  | 3N94     |          |
| <b>ACE2</b>       | S19       | -0.82 | -0.87    | -0.13     | 32.80   | 30.29    | 31.83        | -29.75  | -27.33    | -30.78                                 | 2.24  | 2.10     | 0.91     |
|                   | Q24       | -2.96 | -2.87    | -2.62     | -4.65   | -4.30    | -4.25        | 5.44    | 5.19      | 5.07                                   | -2.17 | -1.98    | -1.80    |
|                   | T27       | -3.10 | -2.54    | -4.73(Y)  | -1.47   | -0.81    | -2.65(Y)     | 2.56    | 1.69      | 4.27(Y)                                | -2.02 | -1.65    | -3.11(Y) |
|                   | K31       | -4.03 | -2.72(N) | -3.37(N)  | 59.97   | -3.55(N) | -11.34(N)    | -56.28  | 5.20(N)   | 11.82(N)                               | -0.33 | -1.07(N) | -2.89(N) |
|                   | H34       | -3.49 | -3.79    | -3.03(I)  | -7.48   | -9.77    | 0.84(I)      | 9.13    | 11.86     | -0.61(I)                               | -1.85 | -1.70    | -2.81(I) |
|                   | E35       | -1.57 | -0.93(K) | -0.93(K)  | -82.40  | 56.09(K) | 66.78(K)     | 82.17   | -53.62(K) | -64.74(K)                              | -1.80 | 1.53(K)  | 1.12(K)  |
|                   | D38       | -0.45 | -0.30    | -0.20     | -102.11 | -95.40   | -91.07       | 99.30   | 92.14     | 88.52                                  | -3.26 | -3.56    | -2.75    |
|                   | Y41       | -3.08 | -2.66    | -2.90     | 2.36    | 0.95     | 1.50         | -0.96   | 0.39      | -0.15                                  | -1.69 | -1.31    | -1.55    |
|                   | L79       | -1.44 | -2.32(F) | -1.89(F)  | 0.28    | -0.03(F) | 0.17(F)      | -0.11   | 0.50(F)   | 0.25(F)                                | -1.27 | -1.86(F) | -1.48(F) |
|                   | Y83       | -1.41 | -1.67    | -1.65     | -4.46   | -2.95    | -3.35        | 2.73    | 2.21      | 2.46                                   | -3.14 | -2.41    | -2.54    |
|                   | K353      | -5.75 | -5.15    | -5.22     | 64.38   | 74.58    | 64.10        | -60.37  | -69.95    | -60.35                                 | -1.74 | -0.52    | -1.47    |
|                   | D355      | -1.90 | -1.91    | -1.74     | -62.93  | -65.62   | -59.89       | 59.59   | 62.91     | 57.24                                  | -5.23 | -4.63    | -4.38    |
|                   | R403      | -1.25 | -0.47    | -0.57     | -136.24 | -151.98  | -166.17      | 135.82  | 149.94    | 165.43                                 | -1.67 | -2.51    | -1.31    |
|                   | E406      | -0.20 | -0.11    | -0.08     | 123.19  | 136.36   | 153.52       | -121.04 | -134.10   | -151.22                                | 1.95  | 2.15     | 2.22     |
|                   | K417N     | -0.27 | -0.29    | -0.16     | -2.59   | -3.41    | -5.15        | 2.98    | 3.90      | 5.43                                   | 0.12  | 0.19     | 0.13     |
|                   | N440K     | -0.05 | -0.05    | -0.06     | -113.54 | -116.03  | -127.89      | 112.29  | 114.74    | 126.48                                 | -1.29 | -1.34    | -1.47    |
|                   | Y449      | -0.27 | -0.31    | -0.34     | -7.00   | -0.04    | -6.90        | 4.65    | 0.41      | 4.33                                   | -2.63 | 0.06     | -2.91    |
|                   | L455      | -2.54 | -1.72    | -1.71     | 1.28    | 1.71     | 1.07         | -1.00   | -1.49     | -0.94                                  | -2.26 | -1.50    | -1.59    |
|                   | F456      | -2.78 | -2.45    | -2.79     | -0.74   | -2.32    | -2.62        | 1.34    | 2.90      | 3.24                                   | -2.18 | -1.87    | -2.17    |
|                   | A475      | -1.44 | -1.40    | -1.68     | -6.11   | -4.66    | -0.86        | 5.70    | 4.48      | 1.54                                   | -1.85 | -1.58    | -1.00    |
|                   | E484A     | -0.10 | -0.16    | -0.15     | -0.33   | -0.56    | -1.68        | 0.48    | 0.77      | 1.85                                   | 0.05  | 0.04     | 0.02     |
| <b>RBD</b>        | F486      | -4.32 | -4.98    | -4.70     | -3.30   | -3.57    | -3.73        | 4.27    | 4.60      | 4.73                                   | -3.35 | -3.95    | -3.70    |
|                   | N487      | -1.60 | -1.81    | -1.72     | -5.42   | -3.96    | -3.62        | 5.09    | 4.17      | 3.70                                   | -1.92 | -1.60    | -1.65    |
|                   | Y489      | -4.10 | -4.03    | -4.38     | -1.55   | -1.13    | -3.58        | 3.03    | 3.18      | 5.38                                   | -2.62 | -1.98    | -2.58    |
|                   | Q493R     | -3.23 | -2.11    | -2.44     | -165.01 | -186.87  | -165.57      | 161.83  | 176.97    | 164.78                                 | -6.41 | -12.00   | -3.23    |
|                   | Y495      | -0.63 | -0.37    | -0.53     | -0.07   | 0.54     | 0.12         | 0.28    | -0.17     | 0.24                                   | -0.41 | 0.01     | -0.18    |
|                   | G496      | -0.44 | -0.25    | -0.37     | 2.44    | 1.91     | 2.96         | -2.11   | -1.54     | -2.65                                  | -0.11 | 0.11     | -0.05    |
|                   | Q498R     | -2.47 | -2.50    | -2.58     | -161.37 | -140.86  | -177.12      | 157.22  | 141.29    | 172.82                                 | -6.62 | -2.07    | -6.88    |
|                   | T500      | -3.00 | -3.15    | -3.60     | -4.28   | -4.34    | -3.81        | 4.13    | 4.04      | 3.65                                   | -3.16 | -3.46    | -3.76    |
|                   | N501Y     | -5.78 | -5.06    | -5.33     | -2.36   | -3.37    | -3.10        | 2.90    | 3.86      | 3.66                                   | -5.24 | -4.58    | -4.77    |
|                   | Y505H     | -4.39 | -3.08    | -3.35     | -9.28   | -3.92    | -7.21        | 9.35    | 5.17      | 8.37                                   | -4.32 | -1.83    | -2.19    |

**Table S10** Energetic contributions of separate residues to bindings of ACE2s to BA.4/5

| Energy (kcal/mol) | $T_{vdW}$ |       |          | $T_{ele}$ |         |          | $T_{gbsolv}$ |         |           | $T_{gbot}$ |       |          |          |
|-------------------|-----------|-------|----------|-----------|---------|----------|--------------|---------|-----------|------------|-------|----------|----------|
|                   | WT        | 3N39  | 3N94     | WT        | 3N39    | 3N94     | WT           | 3N39    | 3N94      | WT         | 3N39  | 3N94     |          |
| <b>ACE2</b>       | S19       | -0.10 | -0.59    | -0.79     | 32.99   | 31.14    | 29.94        | -31.96  | -28.78    | -27.60     | 0.93  | 1.77     | 1.55     |
|                   | Q24       | -2.81 | -2.71    | -2.80     | -3.53   | -3.91    | -3.90        | 4.43    | 4.84      | 5.10       | -1.91 | -1.78    | -1.60    |
|                   | T27       | -2.87 | -2.73    | -4.55(Y)  | -0.87   | -0.57    | -1.22(Y)     | 1.95    | 1.68      | 2.98(Y)    | -1.79 | -1.63    | -2.79(Y) |
|                   | K31       | -3.31 | -3.20(N) | -3.02(N)  | 51.99   | -1.61(N) | -2.18(N)     | -49.42  | 3.42(N)   | 3.87(N)    | -0.74 | -1.39(N) | -1.33(N) |
|                   | H34       | -3.33 | -3.88    | -2.76(I)  | -4.59   | -2.70    | -0.80(I)     | 6.20    | 3.89      | 0.87(I)    | -1.72 | -2.69    | -2.69(I) |
|                   | E35       | -0.85 | -1.84(K) | -0.94(K)  | -67.56  | 50.17(K) | 52.05(K)     | 68.18   | -47.63(K) | -49.85(K)  | -0.23 | 0.70(K)  | 1.26(K)  |
|                   | D38       | -0.28 | -0.94    | -0.76     | -95.45  | -79.73   | -75.38       | 93.06   | 81.09     | 76.70      | -2.67 | 0.41     | 0.56     |
|                   | Y41       | -3.01 | -2.86    | -2.83     | 0.76    | 0.61     | 0.45         | 0.31    | 0.72      | 0.64       | -1.94 | -1.53    | -1.74    |
|                   | L79       | -0.76 | -1.68(F) | -1.67(F)  | 0.19    | -0.03(F) | -0.05(F)     | -0.13   | 0.36(F)   | 0.38(F)    | -0.69 | -1.35(F) | -1.34(F) |
|                   | Y83       | -0.66 | -0.87    | -0.85     | -1.97   | -2.57    | -2.52        | 1.39    | 1.83      | 1.77       | -1.25 | -1.61    | -1.60    |
|                   | K353      | -5.33 | -5.08    | -5.45     | 65.41   | 61.96    | 61.90        | -61.70  | -58.76    | -57.98     | -1.62 | -1.87    | -1.52    |
|                   | D355      | -1.86 | -1.86    | -1.75     | -63.80  | -64.38   | -67.92       | 61.27   | 61.60     | 65.58      | -4.39 | -4.63    | -4.09    |
|                   | R403      | -0.78 | -0.88    | -0.57     | -129.43 | -133.37  | -165.45      | 129.11  | 133.51    | 164.69     | -1.09 | -0.74    | -1.32    |
|                   | D405N     | -0.19 | -0.22    | -0.20     | -0.38   | -0.14    | -1.21        | 0.88    | 0.68      | 1.69       | 0.31  | 0.32     | 0.29     |
|                   | E406      | -0.10 | -0.11    | -0.08     | 118.50  | 129.82   | 152.01       | -116.61 | -127.77   | -149.74    | 1.79  | 1.94     | 2.18     |
|                   | K417N     | -0.20 | -0.21    | -0.15     | -2.43   | -4.43    | -4.66        | 2.83    | 4.75      | 4.95       | 0.20  | 0.11     | 0.14     |
|                   | N440K     | -0.05 | -0.05    | -0.06     | -113.53 | -115.85  | -127.51      | 112.28  | 114.56    | 126.11     | -1.30 | -1.34    | -1.47    |
|                   | Y449      | -0.36 | -0.56    | -0.51     | -7.62   | -6.20    | -4.04        | 4.97    | 4.16      | 2.97       | -3.00 | -2.60    | -1.58    |
|                   | L455      | -1.96 | -1.89    | -1.68     | 0.93    | 2.94     | 1.81         | -0.82   | -2.77     | -1.68      | -1.85 | -1.71    | -1.55    |
|                   | F456      | -2.43 | -2.47    | -2.66     | -1.20   | -2.53    | -2.41        | 1.76    | 3.01      | 3.01       | -1.87 | -1.98    | -2.05    |
|                   | A475      | -1.50 | -1.29    | -1.69     | -1.73   | -4.07    | -3.89        | 2.35    | 3.86      | 3.87       | -0.88 | -1.50    | -1.70    |
|                   | E484A     | -0.08 | -0.13    | -0.13     | -0.36   | -0.57    | -0.87        | 0.50    | 0.75      | 1.06       | 0.06  | 0.05     | 0.06     |
| <b>RBD</b>        | F486V     | -1.64 | -2.53    | -2.76     | -2.39   | -2.93    | -3.41        | 2.53    | 3.05      | 3.48       | -1.50 | -2.41    | -2.69    |
|                   | N487      | -2.04 | -1.93    | -1.97     | -3.15   | -3.24    | -3.39        | 4.32    | 3.91      | 4.07       | -0.87 | -1.27    | -1.29    |
|                   | Y489      | -3.54 | -4.20    | -4.11     | -0.13   | -1.51    | -2.03        | 2.16    | 3.34      | 3.82       | -1.51 | -2.37    | -2.32    |
|                   | Q493      | -2.03 | -2.35    | -1.81     | -12.48  | -9.48    | -5.59        | 11.33   | 9.08      | 6.70       | -3.18 | -2.75    | -0.69    |
|                   | Y495      | -0.69 | -0.88    | -0.48     | 0.03    | 0.63     | -0.49        | 0.32    | 0.07      | 0.55       | -0.34 | -0.18    | -0.42    |
|                   | G496      | -0.40 | -0.37    | -0.31     | 2.35    | 2.34     | 2.76         | -2.10   | -1.99     | -2.49      | -0.14 | -0.03    | -0.05    |
|                   | Q498R     | -2.56 | -2.90    | -3.16     | -161.32 | -146.59  | -179.70      | 156.63  | 147.30    | 179.57     | -7.24 | -2.19    | -3.29    |
|                   | T500      | -3.00 | -3.04    | -3.49     | -3.78   | -3.67    | -3.55        | 4.17    | 3.92      | 3.37       | -2.60 | -2.79    | -3.68    |
|                   | N501Y     | -5.36 | -5.28    | -4.64     | -2.06   | -2.54    | -3.39        | 2.62    | 3.28      | 3.74       | -4.80 | -4.54    | -4.29    |
|                   | Y505H     | -3.56 | -3.72    | -3.30     | -6.75   | -8.02    | -8.26        | 8.11    | 9.53      | 9.58       | -2.20 | -2.20    | -1.99    |

**Table S11** Statistical analysis of hotspot residues and differentiating residues

| Residue types<br>RBD types | Hot spot residue                                                             | Potentially engineerable beneficial<br>residues | Potentially engineerable detrimental<br>residues |
|----------------------------|------------------------------------------------------------------------------|-------------------------------------------------|--------------------------------------------------|
| WT                         | S19, Q24, T27, Y83, K353, D355,                                              | S19, T27V, H34I, Y41, L79V, K353                |                                                  |
|                            | D405, E406, K417, L455, F456, E484, F486, Q493, G496, Q498, T500, N501, Y505 | K417, Y449, F486, Y489, Y495, Q498, N501        | Q493, G496                                       |
| Delta                      | S19, Q24, T27, K31, Y41, Y83, K353, D355                                     | T27V, H34I, K353,                               | Y41, D355                                        |
|                            | D405, E406, K417, L455, F456, E484, F486, Y489, Q493, Q498, T500, N501, Y505 | R403, K417, Y449, A475, Y495, G496              | Y489, Q493, Q498, N501                           |
| BA.1                       | S19, Q24, T27, E35, D38, Y41, Y83                                            | K31N, H34I, D38, K353, D355                     | E35K, Y41                                        |
|                            | R403, D405, E406, L455, F456, A475, F486, Q493R, N501Y, Y505H                | Y449, F486, Q498R, T500, N501Y                  | R403, L455, Q493R, G496S                         |
| BA.2                       | S19, Q24, T27, D38, Y83, D355                                                | S19, T27V, K31N, H34I                           | E35K, K353                                       |
|                            | E406, Y449, L455, F456, F486, N487, Y489, Q493R, Q498R, T500, N501Y, Y505H   | Q493R                                           | Y449, Q493R, Q498R, Y505H                        |
| BA.4/5                     | Q24, D38, Y41, D355                                                          | T27V, H34I                                      | E35K, D38                                        |
|                            | Y449, Q493, Q498R, T500, N501Y, Y505H                                        | F486V, T500                                     | Y449, Q493, Q498R                                |

Hotspot residues: Residues with absolute value contributions to binding free energy of 2 kcal/mol or higher. Potential engineered hotspots: Residues in engineered ACE2s that show a decrease in binding free energy contribution of approximately 1 kcal/mol or higher compared to WT ACE2. Potential engineered unfavorable residues: Residues in engineered ACE2s that show an increase in binding free energy contribution of approximately 1 kcal/mol or higher compared to WT ACE2. Red font represents unfavorable contributions to binding free energy. Red bold font indicates mutations in 3N39. Orange bold font represents mutations present in both 3N39 and 3N94. Blue background represents effects observed in 3N39. Green background represents effects observed in 3N94. Pink background represents effects observed in both 3N39 and 3N94.

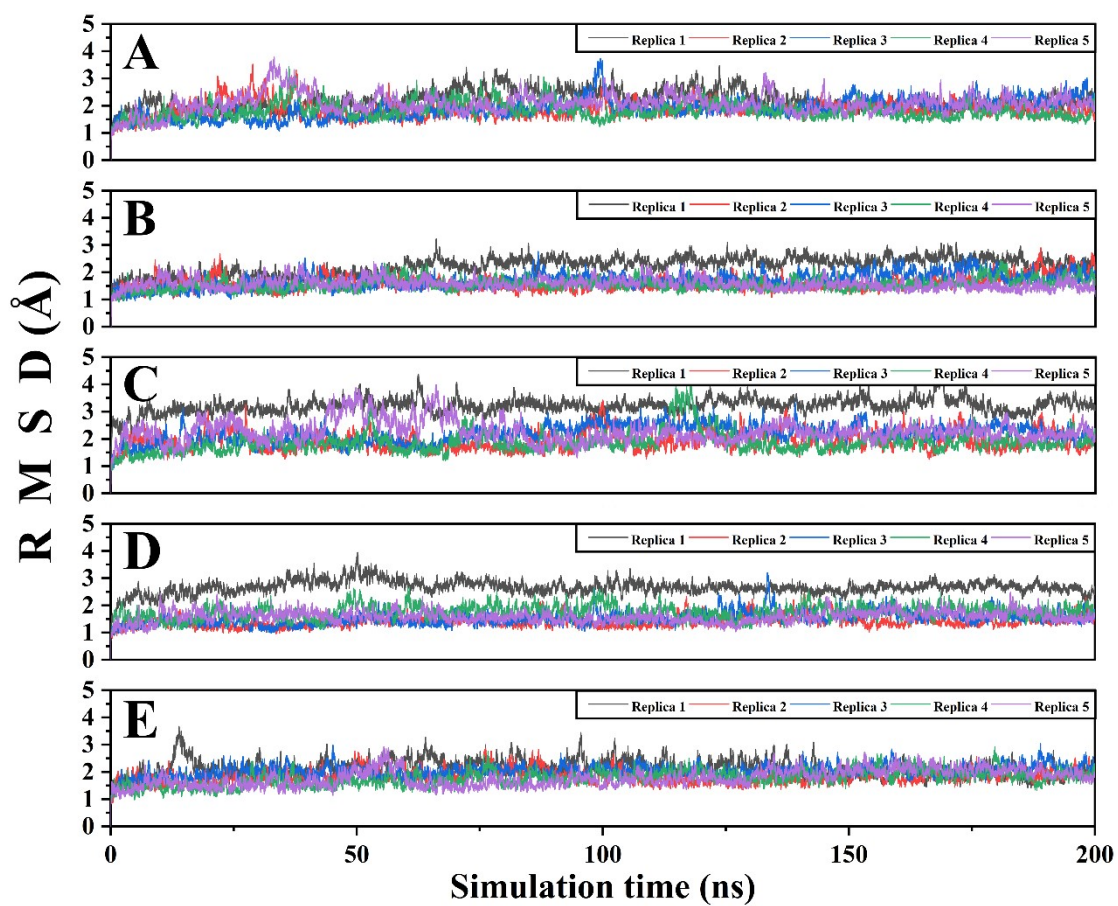

**Fig. S1** Root-mean-square deviations (RMSDs) of backbone atoms in the WT ACE2-RBDs: (A) the WT ACE2-WT, (B) the WT ACE2-Delta, (C) the WT ACE2-BA.1, (D) the WT ACE2-BA.2, (E) the WT ACE2-BA.4/5.

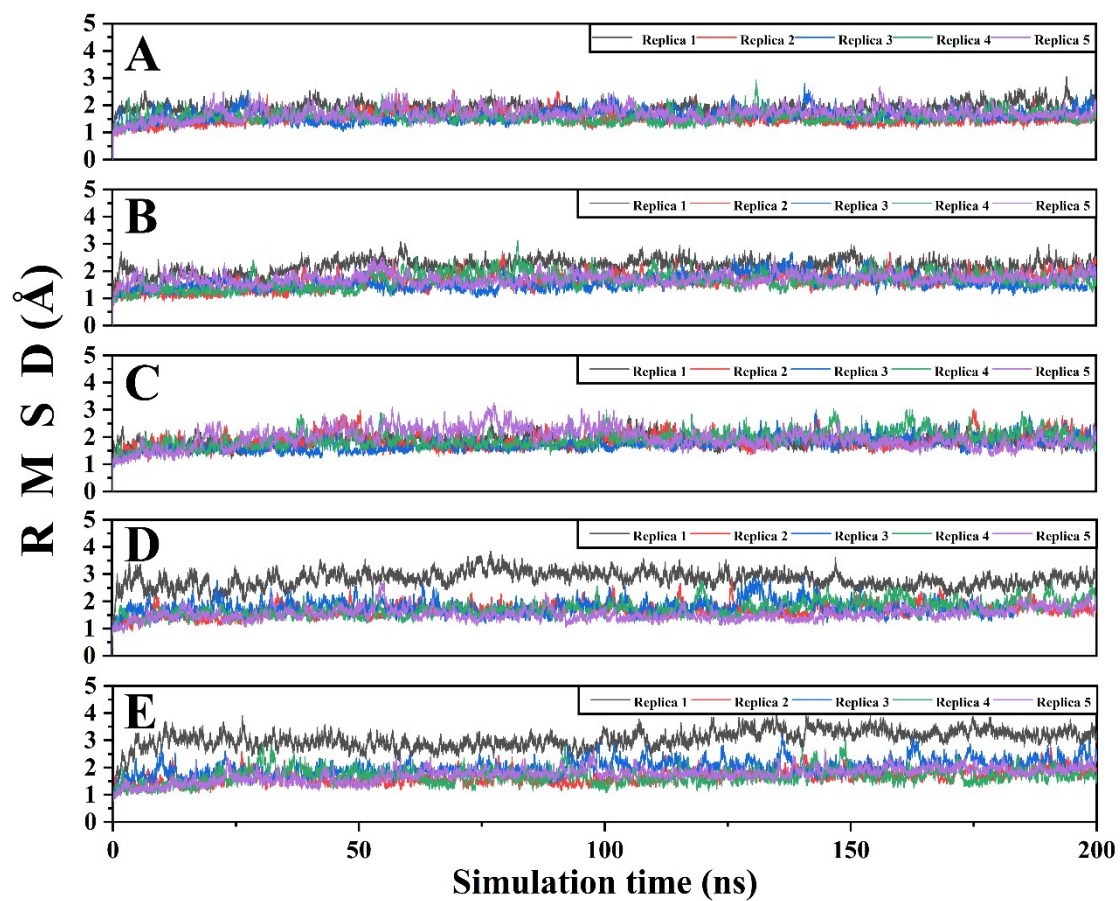

**Fig. S2** Root-mean-square deviations (RMSDs) of backbone atoms in the 3N39-RBDs: (A) the 3N39-WT, (B) the 3N39-Delta, (C) the 3N39-BA.1, (D) the 3N39-BA.2, (E) the 3N39-BA.4/5.

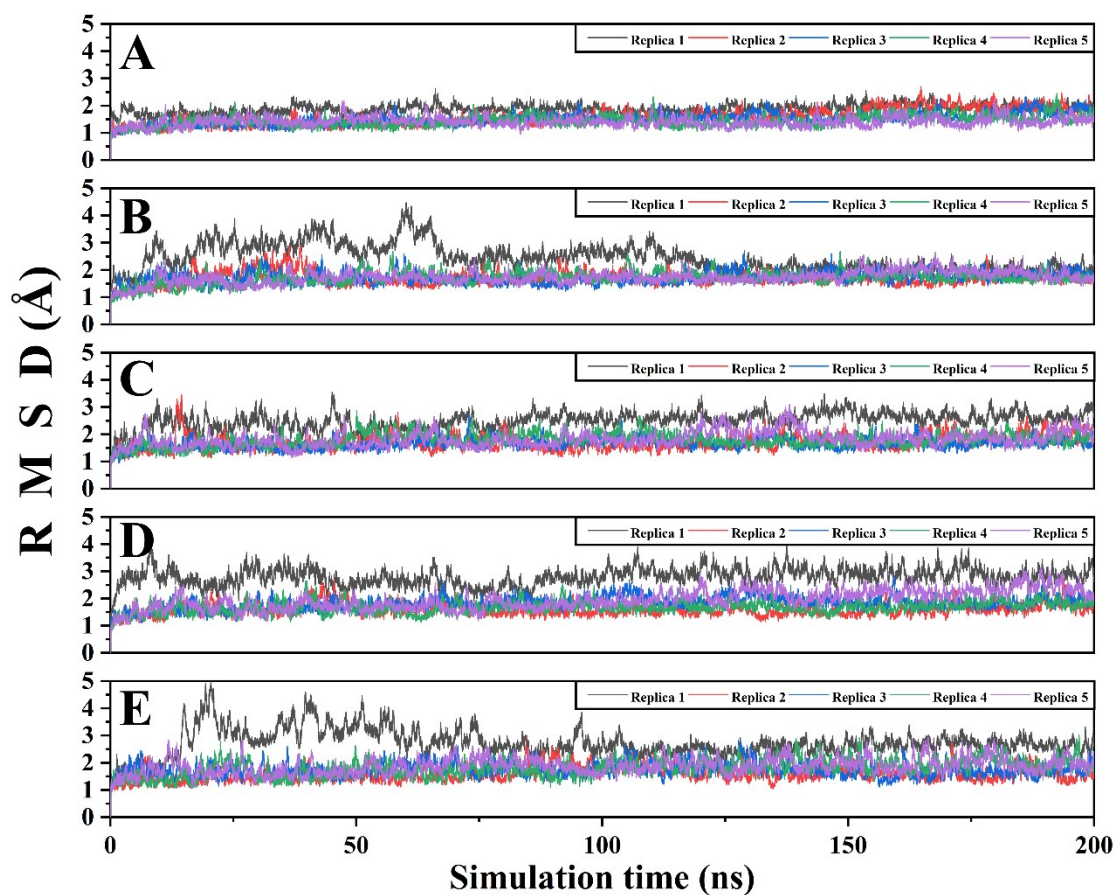

**Fig. S3** Root-mean-square deviations (RMSDs) of backbone atoms in the 3N94-RBDs: (A) the 3N94-WT, (B) the 3N94-Delta, (C) the 3N94-BA.1, (D) the 3N94-BA.2, (E) the 3N94-BA.4/5.

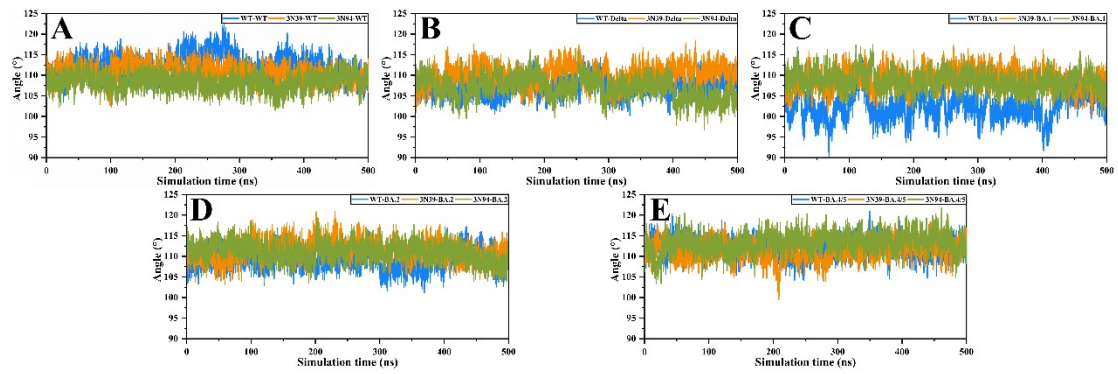

**Fig. S4** The change of the angle of the geometric centers of ACE2, RBD and its RBM region during simulation using the single joined trajectory. (A) the ACE2s-WT, (B) the ACE2s-Delta, (C) the ACE2s-BA.1, (D) the ACE2s-BA.2, (E) the ACE2s-BA.4/5.



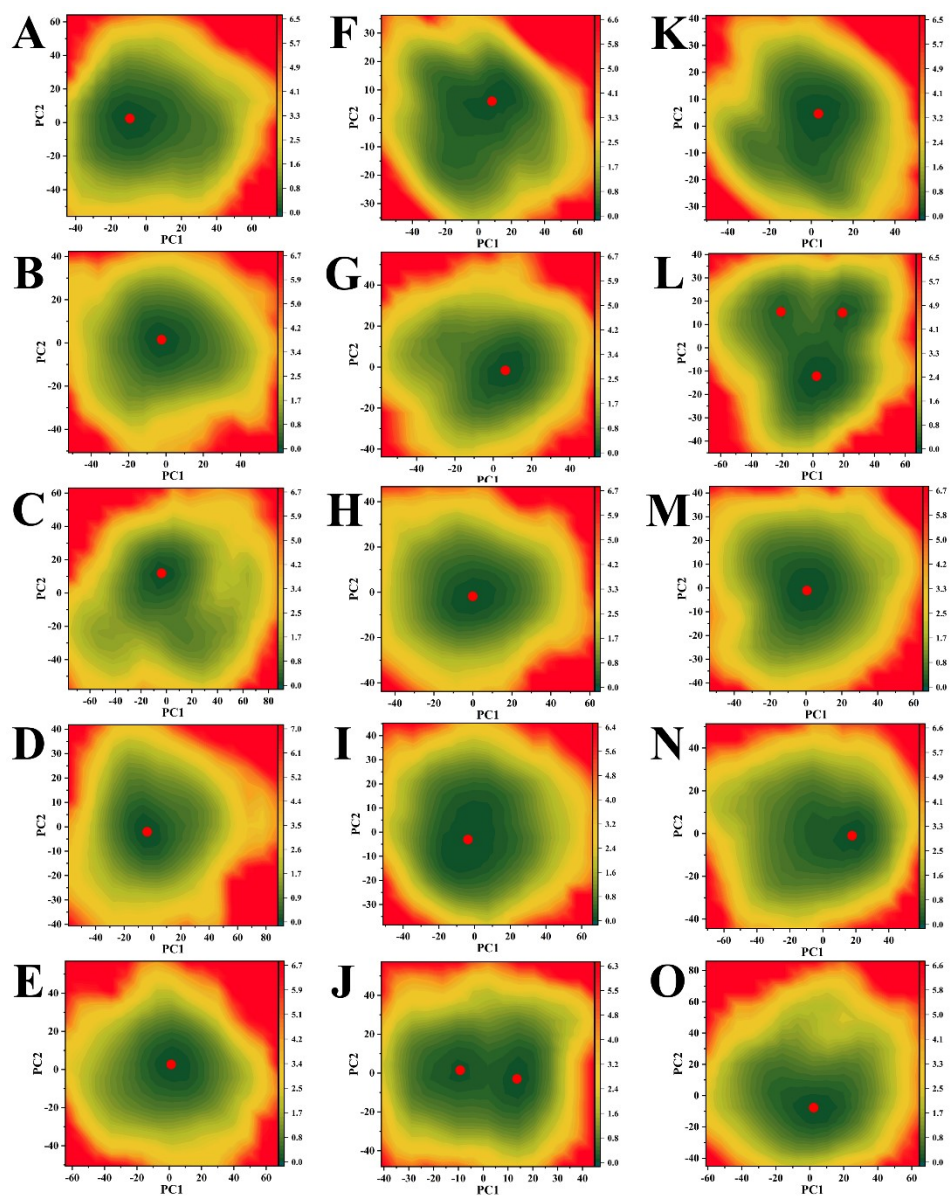

**Fig. S5** Free energy landscapes of ACE2s-RBDs. (A), (B), (C), (D) and (E): WT ACE2-WT RBD/Delta/BA.1/BA.2/BA.4/5. (F), (G), (H), (I) and (J): 3N39-WT RBD/Delta/BA.1/BA.2/BA.4/5. (K), (L), (M), (N) and (O): 3N94-WT RBD/Delta/BA.1/BA.2/BA.4/5.

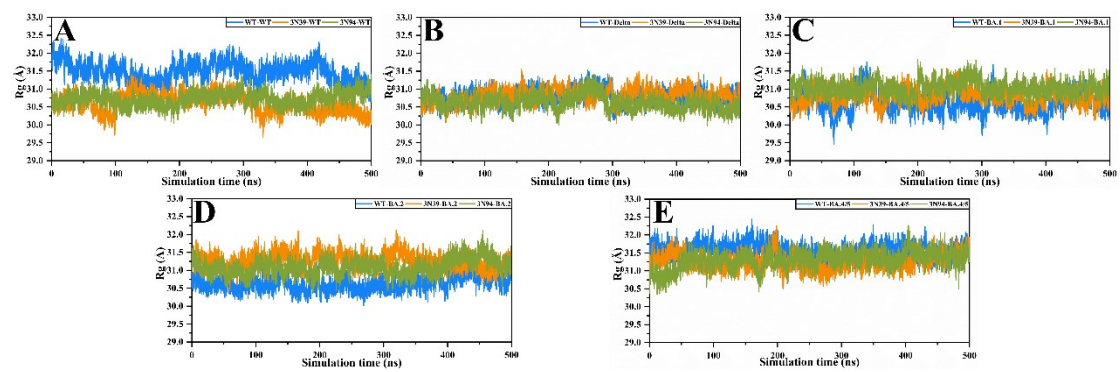

**Fig. S6** The radius of gyration of the whole systems. (A) the ACE2s-WT, (B) the ACE2s-Delta, (C) the ACE2s-BA.1, (D) the ACE2s-BA.2, (E) the ACE2s-BA.4/5.

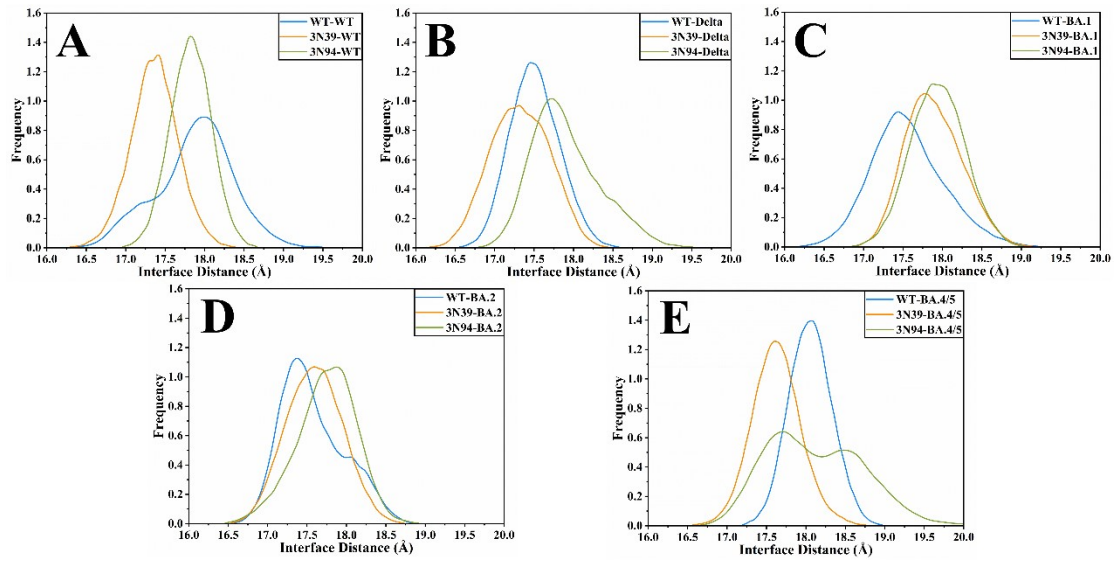

**Fig. S7** The distance between the geometric centers of the binding region of ACE2 and the RBM region of RBD during the simulation process. (A) the ACE2s-WT RBD, (B) the ACE2s-Delta, (C) the ACE2s-BA.1, (D) the ACE2s-BA.2, (E) the ACE2s-BA.4/5.

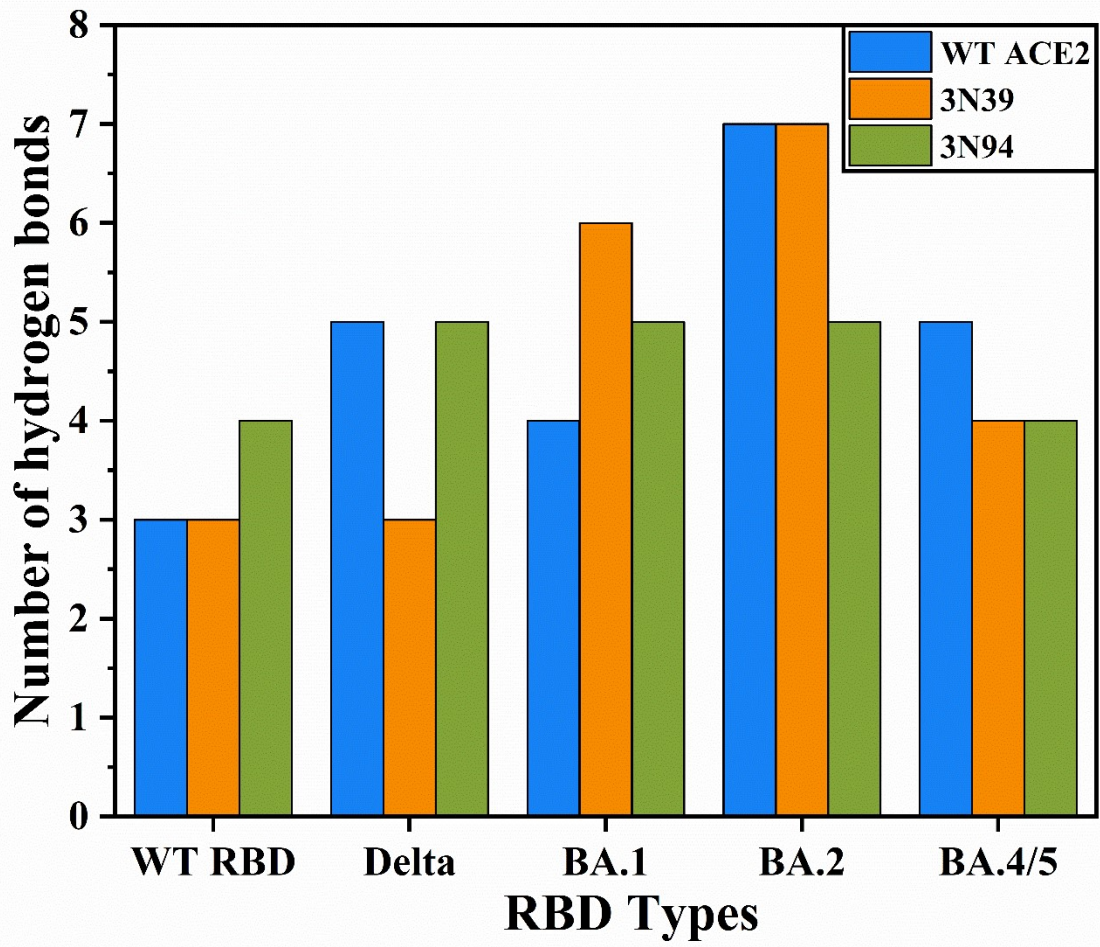

Fig. S8 Comparison of the number of hydrogen bonds in different systems.

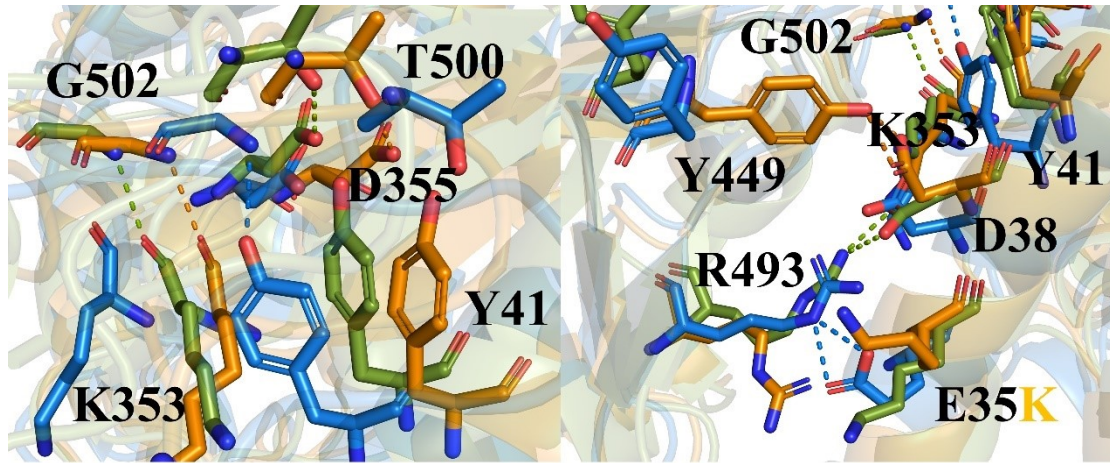

**Fig. S9** Superposition of representative structures of ACE2s-BA.1 RBD, residues involved in hydrogen bond formation are shown as sticks, blue orange and green represent WT ACE2-BA.1,3N39-BA.1,3N94-BA.1 respectively. The orange font represents mutations shared by 3N39 and 3N94.

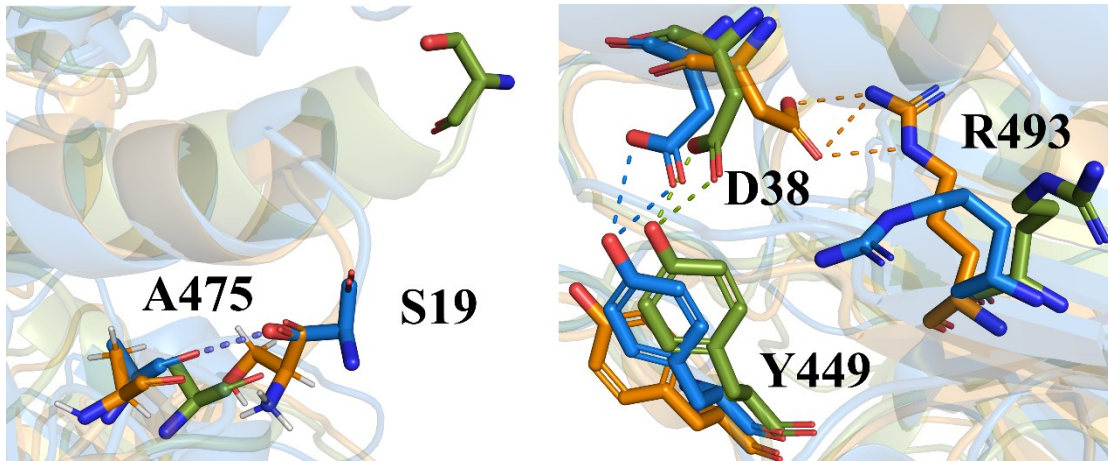

**Fig. S10** Superposition of representative structures of ACE2s-BA.2 RBD, residues involved in hydrogen bond formation are shown as sticks, blue orange and green represent WT ACE2-BA.2,3N39-BA.2,3N94-BA.2 respectively.

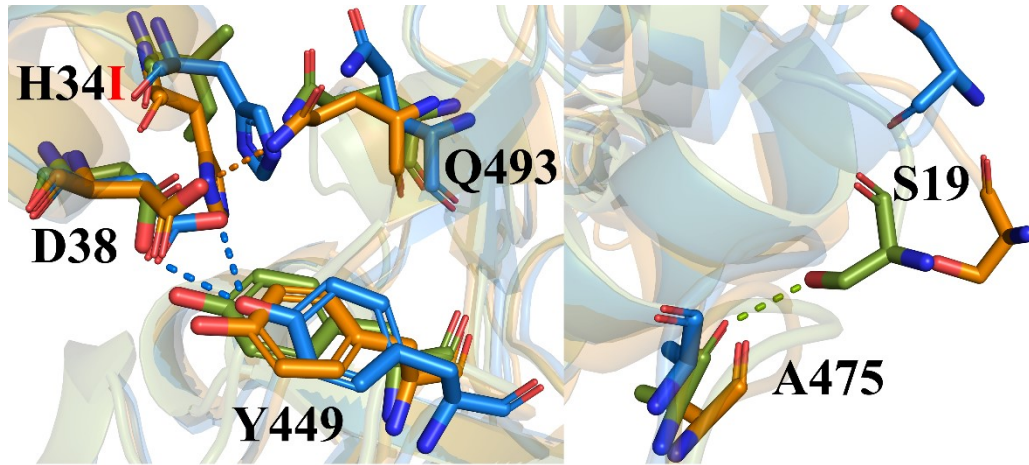

**Fig. S11** Superposition of representative structures of ACE2s-BA.4/5 RBD, residues involved in hydrogen bond formation are shown as sticks, blue orange and green represent WT ACE2-BA.2,3N39-BA.2,3N94-BA.2 respectively. The red font represents mutations unique to 3N94.
